# Supplementary material for: Metazoan parasite infracommunities of the dusky flounder (Syacium papillosum) as bioindicators of environmental conditions in the continental shelf of the Yucatan Peninsula, Mexico
Source: PubMed Central journal article supplement (PMC6545031; doi:10.1186/s13071-019-3524-6), 2019-05-31
Supplement: 13071_2019_3524_MOESM2_ESM.pdf [file 13071_2019_3524_MOESM2_ESM.pdf]

**Metazoan parasites of *Syacium papillosum*. Photographic material and measurements (given in micrometers, otherwise mentioned).**

The following photographs and measurements are presented to sustain our claim that we are dealing with different species of helminths, even for larval stages of digeneans. The material has been organized in phylogenetic order. In several cases measurements were not include because parasite specimens belong to new species that will be published elsewhere.

**MONOGENEA**

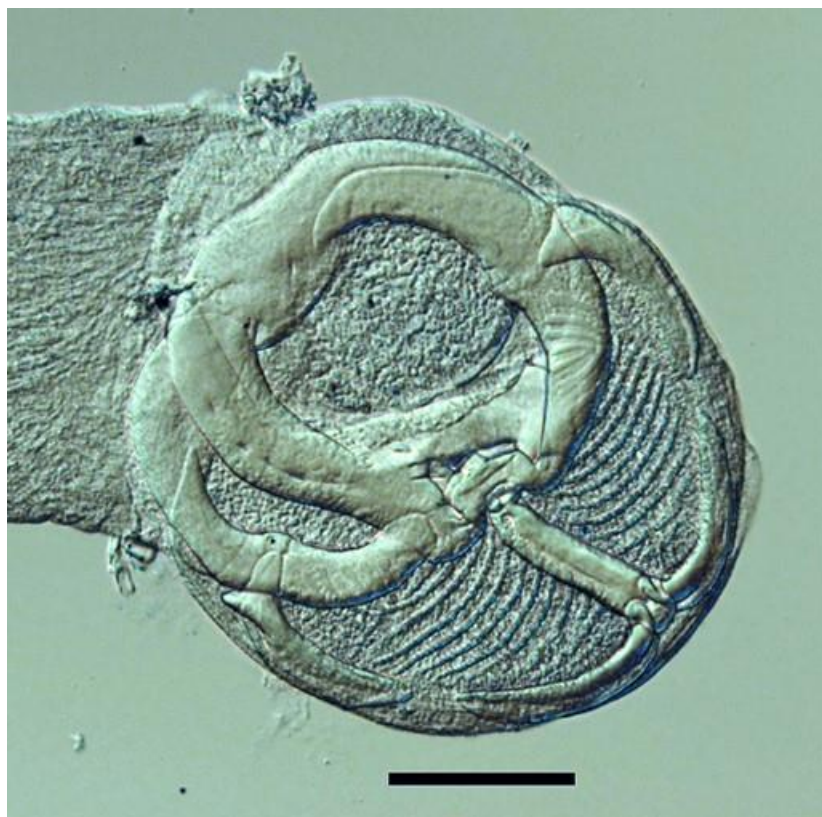

Figure 1. *Neoheterobotrium* n. sp. This is a new species for science and will be fully described elsewhere. Bar=100 micrometers.

## DIGenea

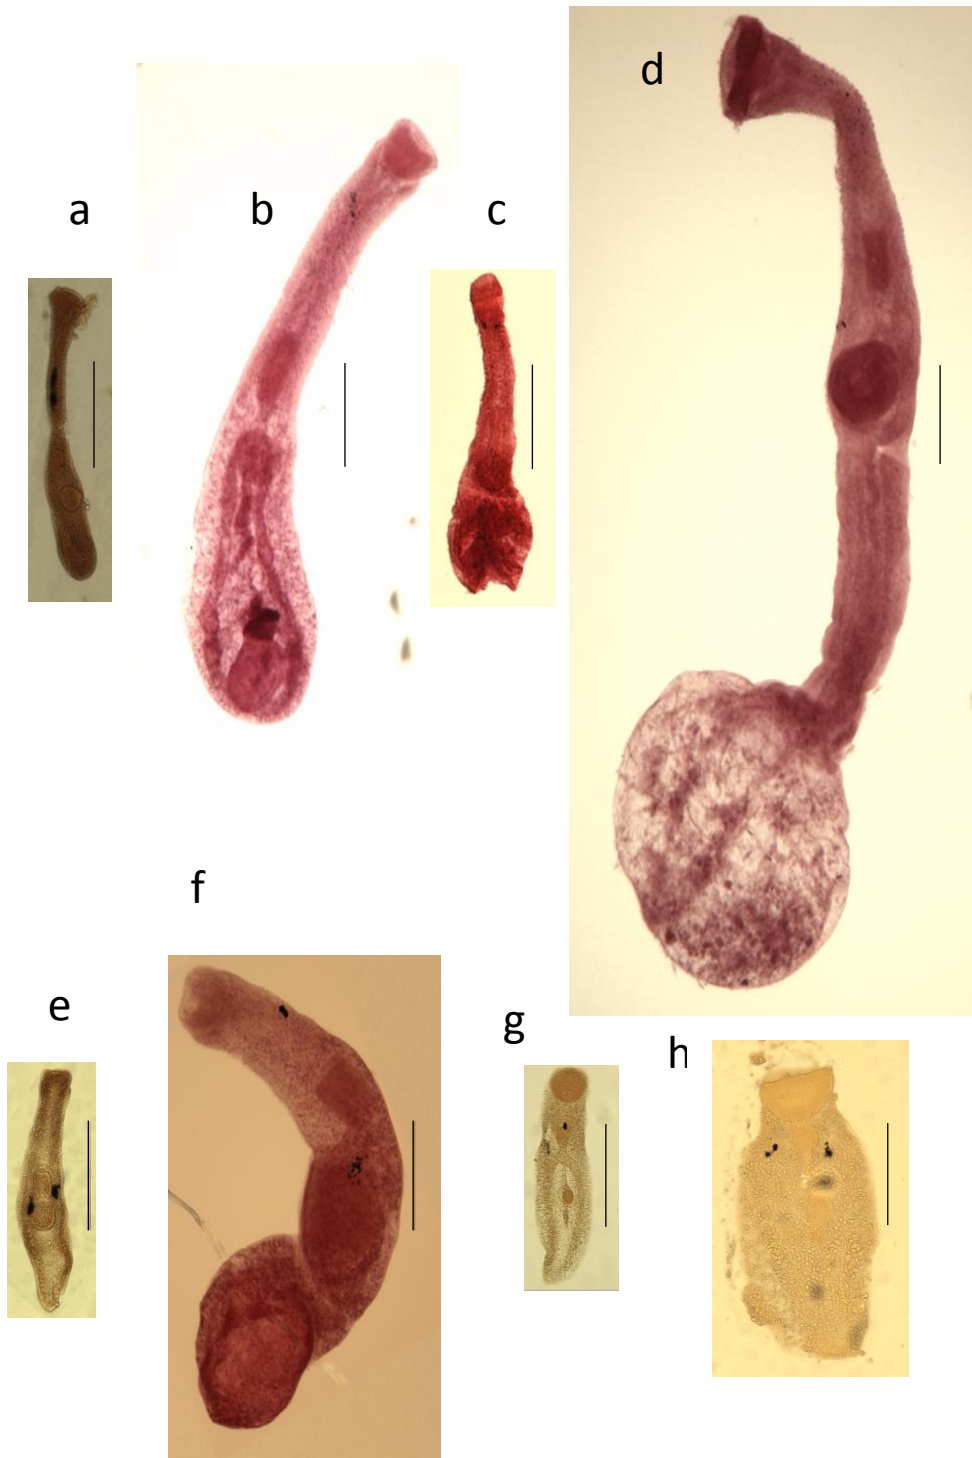

Figure 2. a) *Stephanostomum* sp. 1; b) *Stephanostomum* sp. 2; c) *Stephanostomum* sp. 3; d) *Stephanostomum* sp. 4; e) *Stephanostomum* sp. 5; f) *Stephanostomum* sp. 6; g) *Cryptogonimidae* gen sp. 1; h) *Cryptogonimidae* gen sp. 2. Bar=500 micrometers.

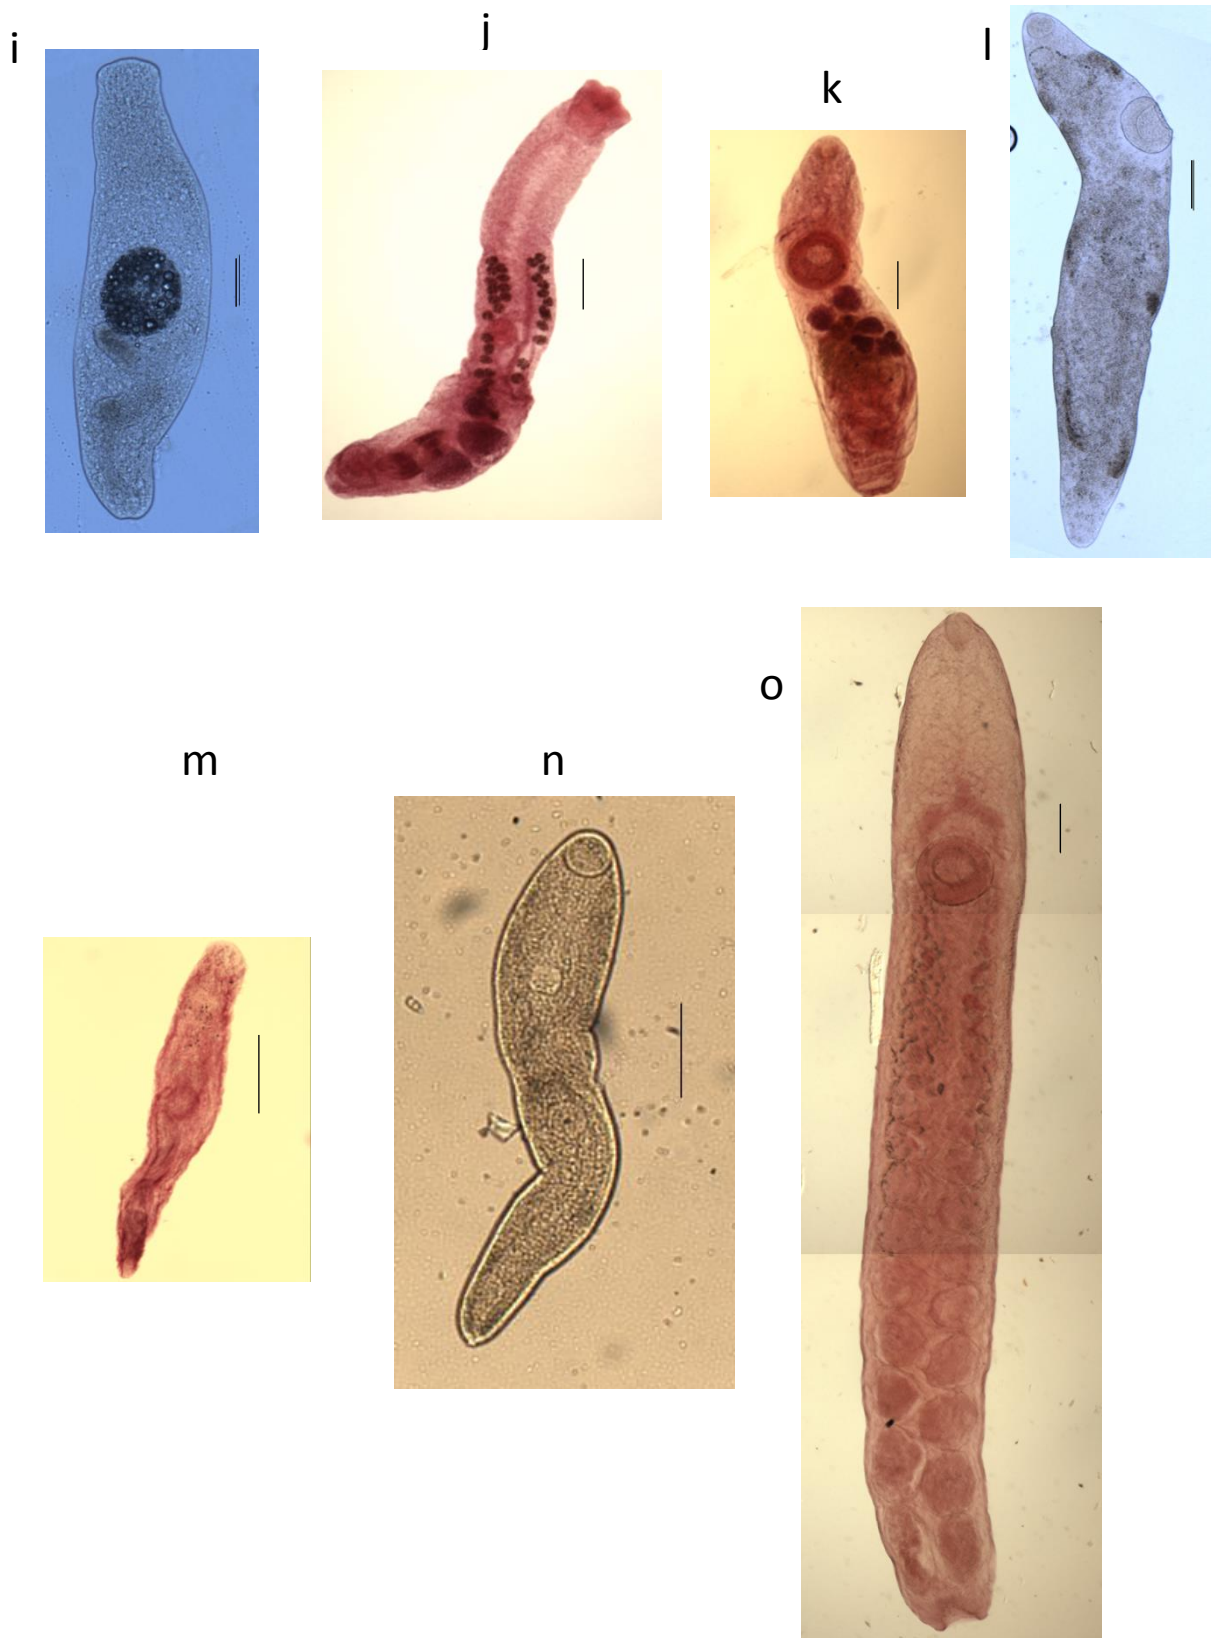

Figure 3. i) *Prosorhynchus* sp.; j) *Rhipidocotyle* sp.; k) *Lecithochirium floridense*; l) *Lecithochirium* sp.; m) *Lepocreadium* sp.; n) *Lepidapedon* sp.; o) Didymozoidae (Neotorticaecum-like). Bar=500 micrometers.

Table 1. Minimum-Maximum (mean) of *Stephanostomum* metacercariae found in *Syacium papillosum* from the Yucatan shelf, southern Mexico.

| <i>Stephanostomum</i> |           | sp. 1               | sp. 2               | sp.3                | sp. 4                        | sp. 5               | sp. 6               |
|-----------------------|-----------|---------------------|---------------------|---------------------|------------------------------|---------------------|---------------------|
|                       |           | Min-Max<br>(Mean)   |                     |                     |                              |                     |                     |
| Body                  | length    | 1587-1816<br>(1702) | 1231-2579<br>(1850) | 1265-1808<br>(1536) | 1651.63-2705.56<br>(1986.62) | 1209-1580<br>(1433) | 2274-3310<br>(2792) |
|                       | width     | 219-256<br>(238)    | 228-463<br>(284)    | 297-571<br>(434)    | 268.03-669.43<br>(464.83)    | 331-421<br>(366)    | 672-676<br>(674)    |
| Oral sucker           | length    | 149-194<br>(171)    | 109-168<br>(137)    | 130-158<br>(144)    | 102.22-152.84<br>(129.92)    | 77-128<br>(95)      | 264-289<br>(276)    |
|                       | width     | 123-192<br>(157)    | 113-167<br>(137)    | 194-230<br>(212)    | 130.11-205.68<br>(167.23)    | 119-233<br>(175)    | 334-370<br>(352)    |
| Spines                | Number    | 40                  | 60-62<br>(61)       | 48                  | 42                           | 32                  | 44                  |
| Ventral sucker        | length    | 144-161<br>(152)    | 99-155<br>(127)     | 136-183<br>(160)    | 140.91-193.04<br>(166.89)    | 179-240<br>(201)    | 442-578<br>(510)    |
|                       | width     | 131-162<br>(146)    | 95-153<br>(122)     | 168-211<br>(190)    | 116.28-180.04<br>(149.65)    | 149-237<br>(185)    | 481-515<br>(498)    |
| Sucker radio          | 1:        | 0.86-0.94<br>(0.90) | 0.76-1.05<br>(0.90) | 0.78-1.21<br>(0.99) | 1-1.10<br>(1.06)             | 1.35-1.51<br>(1.42) | 1.48-1.72<br>(1.60) |
|                       | Distance* | 1070-1115<br>(1093) | 591-1362<br>(971)   | 839-968<br>(903.39) | 647.77-941.86<br>(792.06)    | 700-1002<br>(866)   | 1280-1615<br>(1447) |
|                       | %         | 61.3-67<br>(64.4)   | 48.-55<br>(52)      | 53-66<br>(60)       | 31.1-45.5<br>(40.6)          | 57-66<br>(60)       | 49-56<br>(52)       |

\*=distance from the Ventral sucker to the anterior end of the body; % = distance as % of body length

Table 2. Measurements of metacercariae of the family Cryptogonimidae and Bucephalidae from *S. papillosus* from the Yucatan shelf.

|                |           | <i>Cryptogonimidae gen sp.</i> | <i>Cryptogonimidae gen sp.2</i> |           |          | <i>Prosorhynchus sp.</i> | <i>Rhipidocotyle sp.</i> |
|----------------|-----------|--------------------------------|---------------------------------|-----------|----------|--------------------------|--------------------------|
|                |           | Min-Max<br>(Mean)              |                                 |           |          |                          |                          |
| Body           | length    | 1124-1248<br>(1195)            | 789-1656<br>(1131)              | Body      | length   | 1472-2167<br>(1842)      | 3829                     |
|                | width     | 349-486<br>(409)               | 483-976<br>(662)                |           | width    | 340-572<br>(445)         | 551                      |
| Oral sucker    | length    | 154.4-218.28<br>(192.76)       | 162-356<br>(231)                | Rhynchus  | length   | 90-336<br>(199)          | 354                      |
|                | width     | 168-303<br>(242)               | 314-513<br>(391)                |           | width    | 157-212<br>(177)         | 337                      |
| Ventral sucker | diameter  | 64-108<br>(75)                 | 74-141<br>(100)                 | Mouth     | diameter | 57-86<br>(74)            | 160                      |
| Sucker radio   | 1         | 0.30-0.41<br>(0.34)            | 0.1-0.31<br>(0.22)              | Distance* |          | 825-1420<br>(1139)       | 1942                     |
|                | distance* | 561-704<br>(624)               | 317-732<br>(478)                |           | %        | 56-65<br>(61)            | 50                       |
|                | %         | 46-56<br>(52)                  | 40-44<br>(42)                   |           |          |                          |                          |

\*=distance of the Ventral sucker respect to the anterior end of the body; % = distance as % of body length

Table 3. Morphological measurements of adult trematodes found in *S. papillosum* from the Yucatan shelf.

|                |           | <i>Lecithochirium floridense</i> | <i>Lecithochirium</i> sp. | <i>Lepocreadium</i> sp. | <i>Lepidapedon</i> sp. | <i>Neotorticaecum</i> sp. |
|----------------|-----------|----------------------------------|---------------------------|-------------------------|------------------------|---------------------------|
|                |           | Min-Max<br>(mean)                |                           |                         |                        |                           |
| Body           | length    | 1769-2523<br>(2035)              | 2610                      | 1301                    | 2588                   | 3575-4715<br>(4054)       |
|                | width     | 360-488<br>(419)                 | 408                       | 242                     | 470                    | 450-604<br>(526)          |
| Oral sucker    | length    | 107-137<br>(117)                 | 108                       | 104                     | 241                    | 105-152<br>(122)          |
|                | width     | 105-128<br>(114)                 | 110                       | 104                     | 312                    | 77-132<br>(104)           |
| Ventral sucker | length    | 300-308<br>(304)                 | 253                       | 80                      | 249                    | 136-290<br>(234)          |
|                | width     | 301-309<br>(304)                 | 217                       | 79                      | 241                    | 241-352<br>(296)          |
| Sucker radio   | 01:00     | 2.32-2.84<br>(2.65)              | 2.158                     | 0.76                    | 0.89                   | 1.71-2.91<br>(2.41)       |
|                | Distance* | 454-557<br>(493)                 | 583                       | 666                     | 1104                   | 918-1060<br>(1016)        |
|                | %         | 18-31<br>(25)                    | 22                        | 51                      | 43                     | 22-30<br>(25)             |

\*=distance of the Ventral sucker respect to the anterior end of the body; % = distance as % of body length



**CESTODA**

**a**

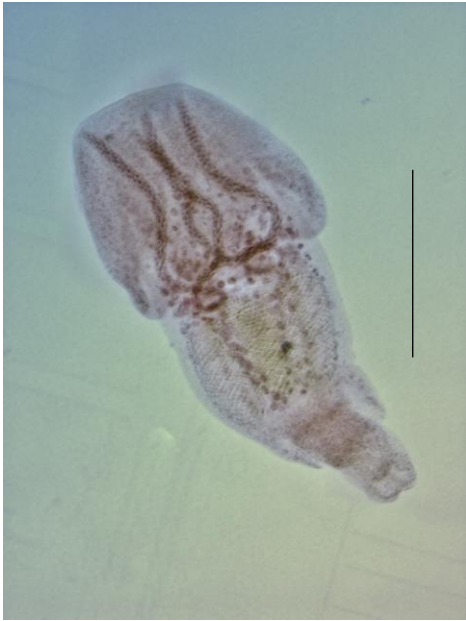

**b**

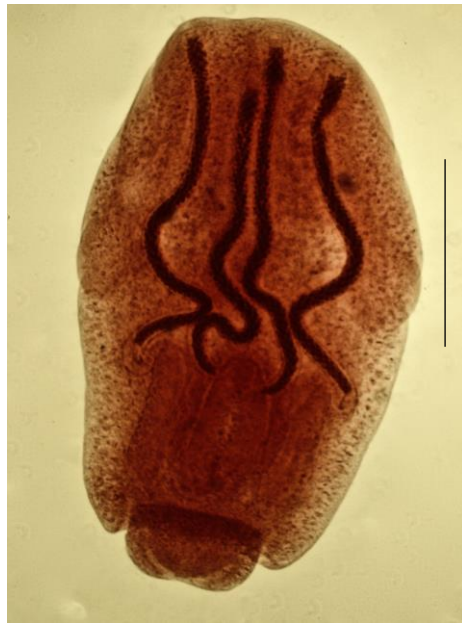

**c**

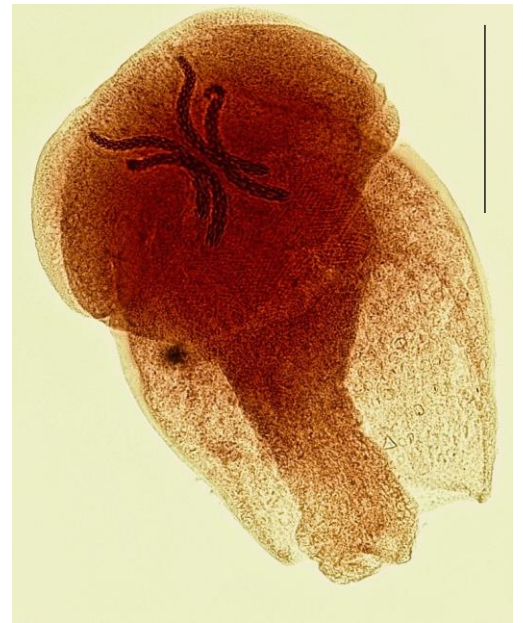

**d**

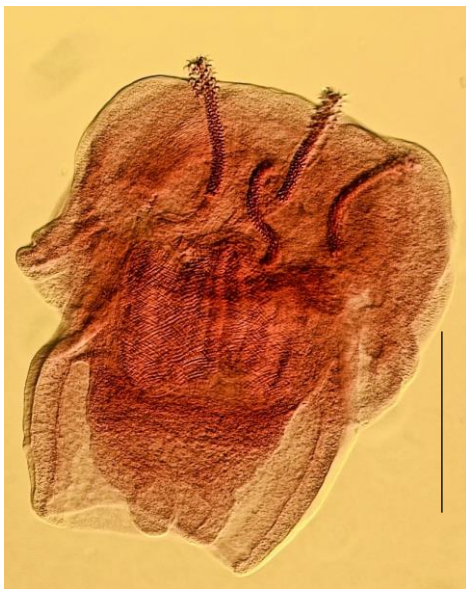

**e**

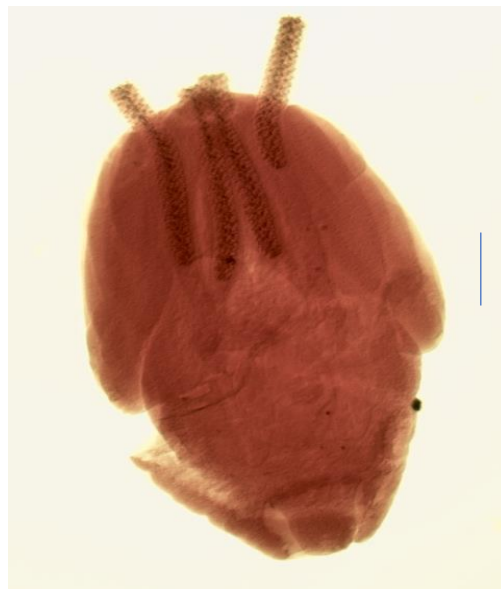

**f**

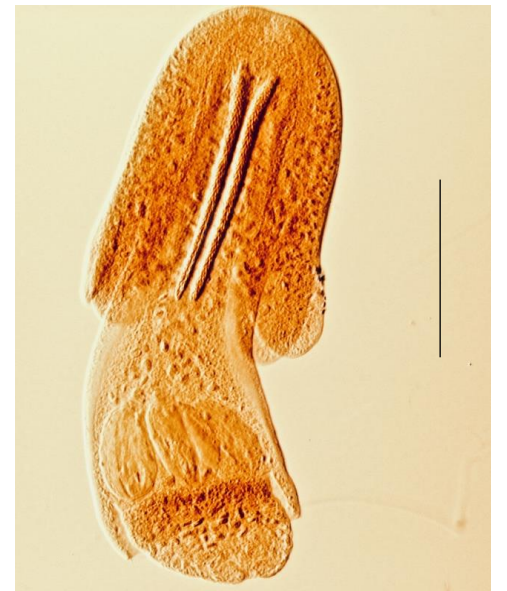

Figure 4. a) *Nybelinia* sp. 1; b) *Nybelinia* sp. 2; c) *Nybelinia* sp. 3; d) *Nybelinia* sp. 4; e) *Nybelinia* sp. 5; f) *Kotorella pronosoma*. Bar= 500 micrometers.

g

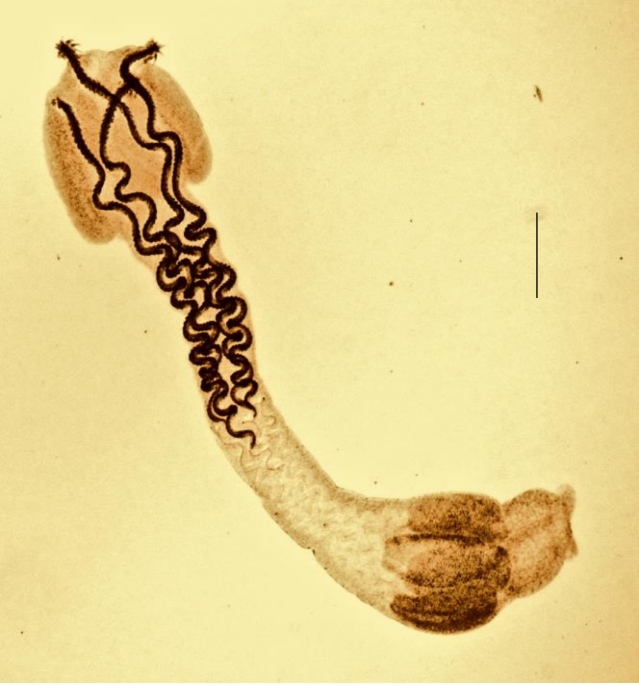

h

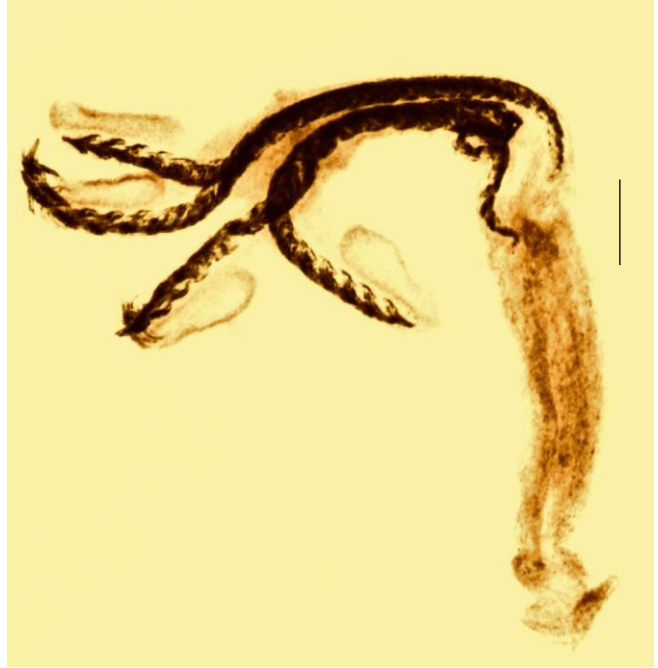

.....|

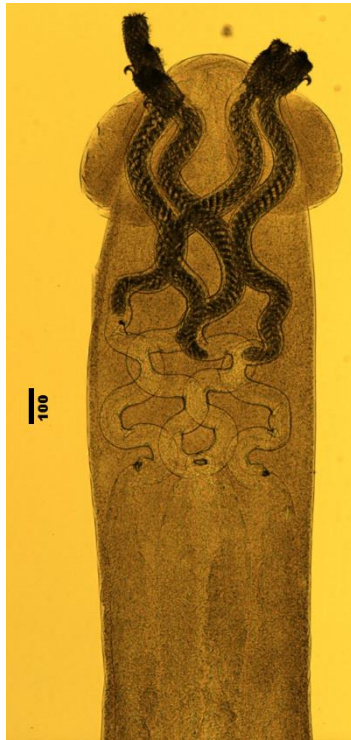

Figure 5. g) *Lacistorhynchus* sp.; h) *Pterobothrium* gen. sp.; i) *Oncomegas wagneri*. Bar= 500 micrometers.



**Table 4.** Measurements of cestodes in larval stage found in *S. papillosum* from the Yucatan shelf.

| Parasites<br>(no. Individuals)         | Scolex length<br>(Max-Min)<br>Mean | Pars bothridialis length | Pars vaginalis   | Pars bulb length    | Pars bulb width | Pedunculus scolesis | Tentacle length  |
|----------------------------------------|------------------------------------|--------------------------|------------------|---------------------|-----------------|---------------------|------------------|
| <i>Nybelinia</i> sp.1 (4)              | (699-839)<br>736                   | (289-382)<br>326.63      | (290-397)<br>325 | (179-200)<br>190.09 | (65-74)<br>69   | (566-681)<br>612    | (372-399)<br>381 |
| <i>Nybelinia</i> sp. 2 (2)             | (474-512)<br>493                   | (244-267)<br>256         | (257-297)<br>277 | (115-129)<br>122    | (44-58)<br>51   | (414-465)<br>439    | (323-381)<br>352 |
| <i>Nybelinia</i> sp. 3 (7)             | (501-803)<br>608                   | (213-367)<br>268         | (192-298)<br>247 | (93-168)<br>116     | (36-82)<br>52   | (411-755)<br>550    | (108-249)<br>162 |
| <i>Nybelinia</i> sp. 4 (6)             | (645-814)<br>736                   | (312-423)<br>362         | (151-229)<br>185 | (179-241)<br>225    | (71-106)<br>83  | (660-795)<br>733    | (138-234)<br>200 |
| <i>Nybelinia</i> sp. 5 (1)             | 501                                | 321                      | 274              | 78                  | 29              | 489                 | 206              |
| <i>Kotorella<br/>promosoma</i><br>(10) | (607-1065)<br>859                  | (305.05-386)<br>353      | (380-488)<br>432 | (101-140)<br>114    | (34-64)<br>46   | (527-668)<br>642    | (251-276)<br>261 |
| <i>Lacistorhynchus</i> sp.<br>(2)      | (716-758)<br>737                   | (83.53-85)<br>85         | (287-292)<br>290 | (62-64)<br>63       | (19-25)<br>22   | (344-352)<br>348    | (285-302)<br>293 |
| <i>Pterobothrium</i> sp.<br>(1)        | 607                                | 72                       | 383              | –                   | –               | –                   | 316              |

## NEMATODA

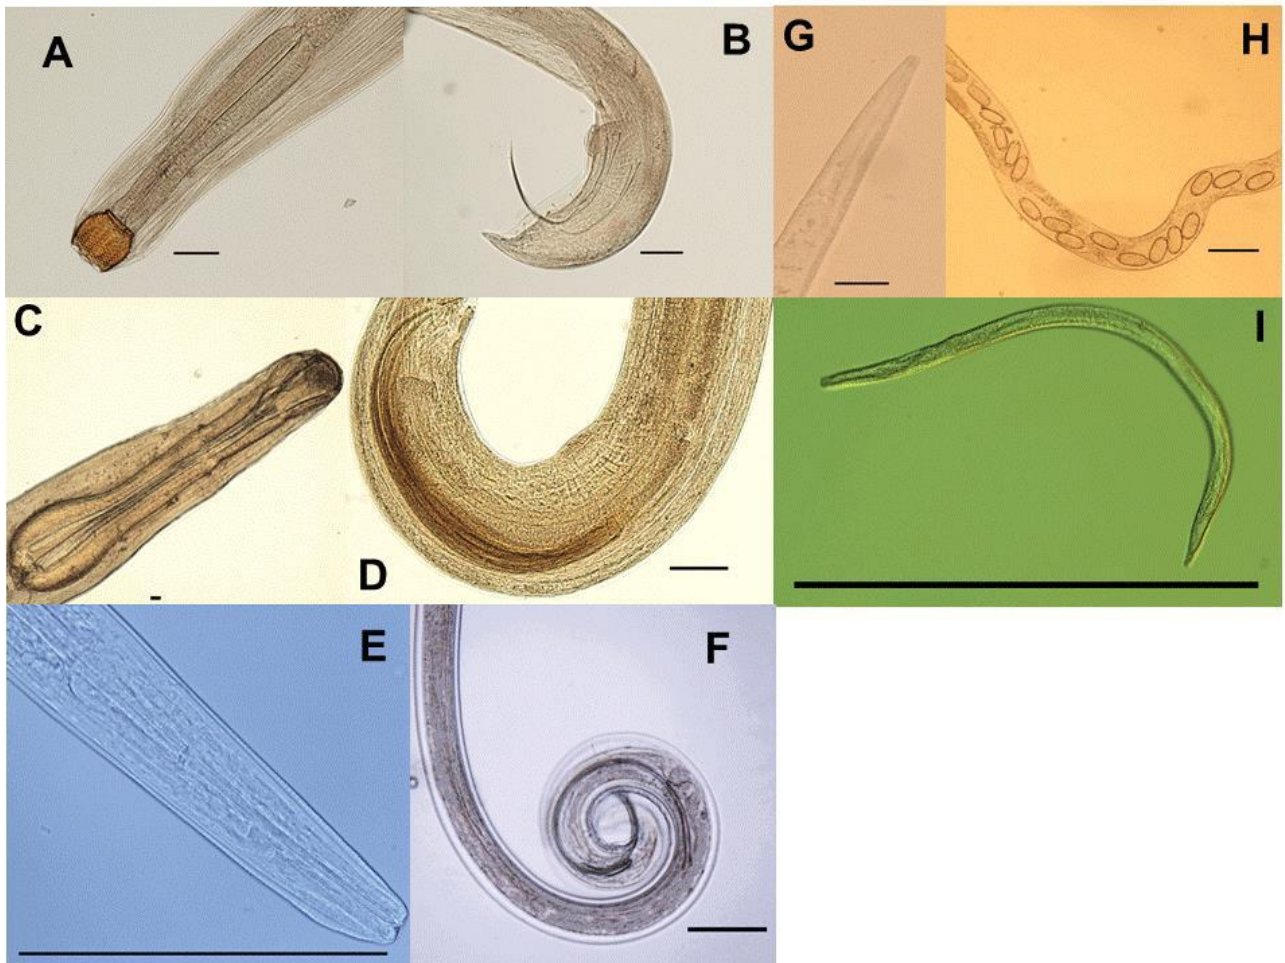

Figure 6. *Spirocamallanus chetumalensis*, A) anterior end, B) posterior end; *Cucullanus* sp., C) anterior end, D) posterior end; *Johnstonmawsonia* sp. E) anterior end (Scale bar: 50  $\mu$ m), F) posterior end; Capillariidae gen. sp. G) anterior end, H) posterior end; I) *Anisakis* sp. (Scale bar: 100  $\mu$ m).

ARTHROPODA

a

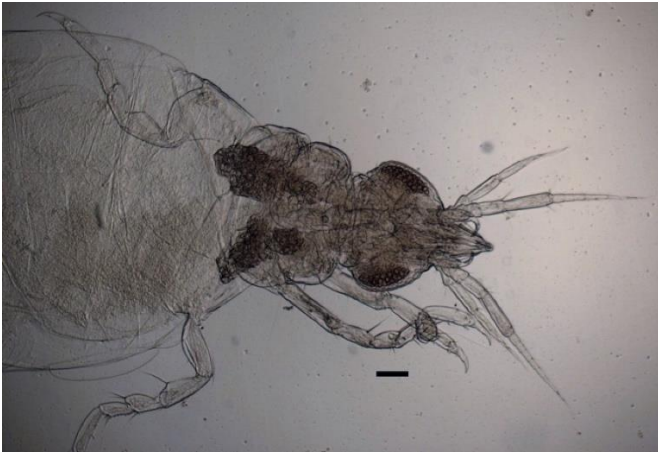

b

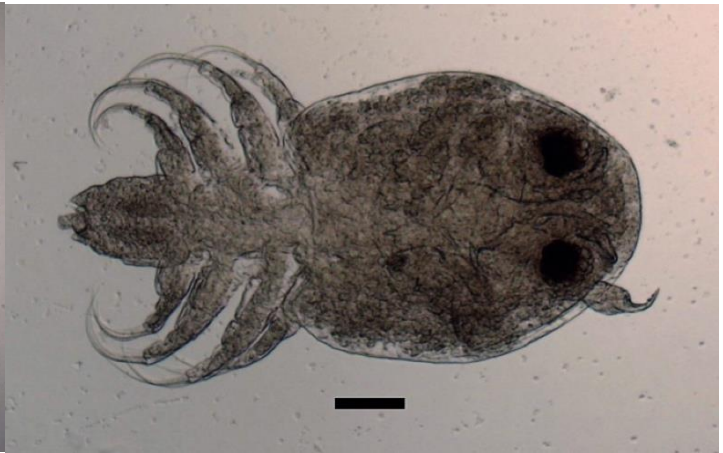

Figure 7. a. *Gnathia* sp. (scale bar= 100 micrometers); b. *Argulus* sp. (scale bar= 100 micrometers).
